# Supplementary material for: Investigation of LINC00493/SMIM26 Gene Suggests Its Dual Functioning at mRNA and Protein Level
Source: MDPI journal article supplement (doi:10.3390/ijms22168477), 2021-08-06
Supplement: s1 [file s1]

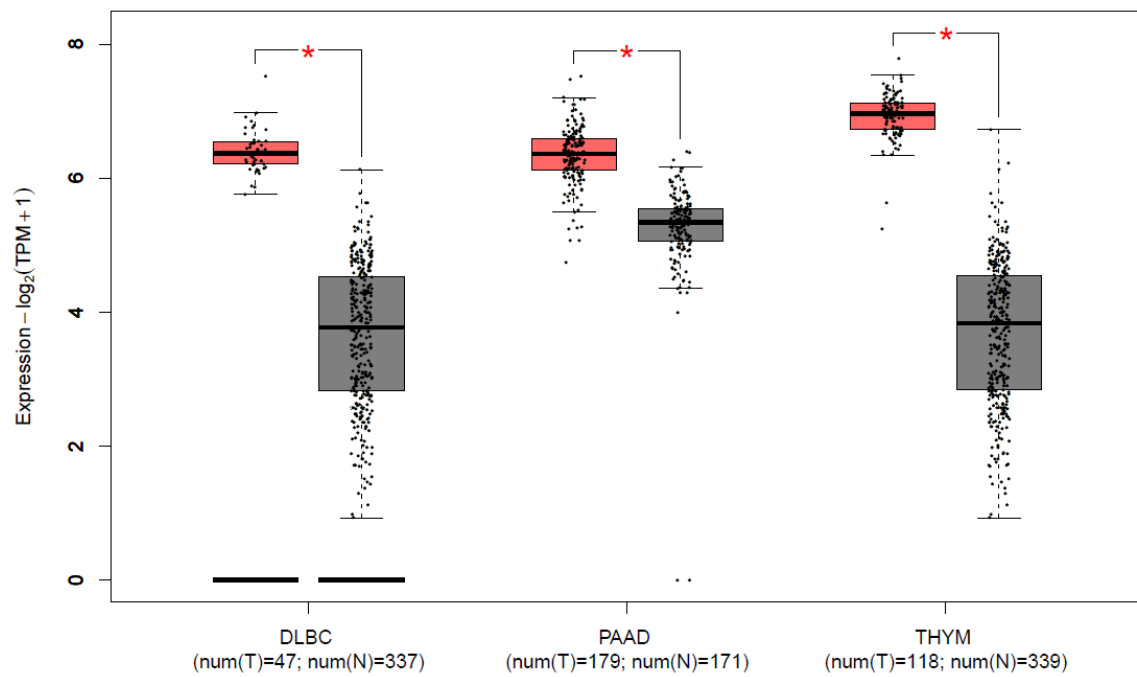

**Figure S1.** *LINC00439* is significantly higher expressed in DLBC (lymphoid neoplasm diffuse large B-cell lymphoma), PAAD (pancreatic adenocarcinoma) and THYM (thymoma) tissues compared to normal tissues.
